# Supplementary material for: Integrated proteomic and metabolomic analysis of plasma reveals regulatory pathways and key elements in thyroid cancer
Source: Royal Society of Chemistry journal article supplement (doi:10.1039/d3mo00142c), 2023-08-16
Supplement: d3mo00142c1.pdf [file d3mo00142c1.pdf]

**Table S1 Background of plasma samples in the discovery and validation sets.**

| <b>Discovery Set</b>  |                   |               |                             |
|-----------------------|-------------------|---------------|-----------------------------|
| <b>No.</b>            | <b>Age (year)</b> | <b>Gender</b> | <b>Disease</b>              |
| 1                     | 47                | Female        | Papillary Thyroid Carcinoma |
| 2                     | 28                | Female        | Papillary Thyroid Carcinoma |
| 3                     | 26                | Female        | Papillary Thyroid Carcinoma |
| 4                     | 37                | Female        | Papillary Thyroid Carcinoma |
| 5                     | 31                | Female        | Papillary Thyroid Carcinoma |
| 6                     | 46                | Female        | Papillary Thyroid Carcinoma |
| 7                     | 50                | Female        | Papillary Thyroid Carcinoma |
| 8                     | 32                | Female        | Papillary Thyroid Carcinoma |
| 9                     | 49                | Female        | Papillary Thyroid Carcinoma |
| 10                    | 30                | Female        | Papillary Thyroid Carcinoma |
| 11                    | 22                | Female        | Multinodular Goiter         |
| 12                    | 23                | Female        | Multinodular Goiter         |
| 13                    | 27                | Female        | Multinodular Goiter         |
| 14                    | 31                | Female        | Multinodular Goiter         |
| 15                    | 32                | Female        | Multinodular Goiter         |
| 16                    | 36                | Female        | Multinodular Goiter         |
| 17                    | 37                | Female        | Multinodular Goiter         |
| 18                    | 43                | Female        | Multinodular Goiter         |
| 19                    | 45                | Female        | Multinodular Goiter         |
| 20                    | 47                | Female        | Multinodular Goiter         |
| 21                    | 48                | Female        | Multinodular Goiter         |
| 22                    | 49                | Female        | Multinodular Goiter         |
| 23                    | 49                | Female        | Multinodular Goiter         |
| 24                    | 49                | Female        | Multinodular Goiter         |
| 25                    | 50                | Female        | Multinodular Goiter         |
| <b>Validation Set</b> |                   |               |                             |
| <b>No.</b>            | <b>Age</b>        | <b>Gender</b> | <b>Disease</b>              |
| 1                     | 64                | Female        | Papillary Thyroid Carcinoma |
| 2                     | 31                | Female        | Papillary Thyroid Carcinoma |
| 3                     | 67                | Female        | Papillary Thyroid Carcinoma |
| 4                     | 56                | Male          | Papillary Thyroid Carcinoma |
| 5                     | 64                | Female        | Papillary Thyroid Carcinoma |
| 6                     | 28                | Female        | Papillary Thyroid Carcinoma |
| 7                     | 65                | Male          | Papillary Thyroid Carcinoma |
| 8                     | 46                | Female        | Papillary Thyroid Carcinoma |
| 9                     | 47                | Female        | Papillary Thyroid Carcinoma |
| 10                    | 48                | Female        | Papillary Thyroid Carcinoma |
| 11                    | 66                | Female        | Multinodular Goiter         |
| 12                    | 58                | Female        | Multinodular Goiter         |
| 13                    | 29                | Female        | Multinodular Goiter         |

|    |    |        |                     |
|----|----|--------|---------------------|
| 14 | 31 | Female | Multinodular Goiter |
| 15 | 64 | Female | Multinodular Goiter |
| 16 | 46 | Female | Multinodular Goiter |
| 17 | 47 | Female | Multinodular Goiter |
| 18 | 69 | Male   | Multinodular Goiter |
| 19 | 65 | Female | Multinodular Goiter |
| 20 | 49 | Female | Multinodular Goiter |

---

**Table S2 Differentially expressed proteins.**

| <b>UniProt ID</b> | <b>Symbol ID</b> | <b>Descriptions</b>                        | <b>p value</b> | <b>log2FC</b> |
|-------------------|------------------|--------------------------------------------|----------------|---------------|
| P01024            | C3               | Complement C3                              | 1.96E-02       | 0.24          |
| P02533            | KRT14            | Keratin, type I cytoskeletal 14            | 1.73E-03       | -1.67         |
| P02741            | CRP              | C-reactive protein                         | 4.36E-02       | 2.72          |
| P02748            | C9               | Complement component C9                    | 8.67E-03       | 0.57          |
| P04180            | LCAT             | Phosphatidylcholine-sterol acyltransferase | 3.32E-02       | -0.30         |
| P04264            | KRT1             | Keratin, type II cytoskeletal 1            | 4.47E-02       | -1.28         |
| P07360            | C8G              | Complement component C8 gamma chain        | 1.17E-02       | -0.45         |
| P12830            | CDH1             | Cadherin-1                                 | 4.29E-02       | -0.37         |
| P15144            | ANPEP            | Aminopeptidase N                           | 4.13E-03       | -0.53         |
| P22352            | GPX3             | Glutathione peroxidase 3                   | 3.09E-03       | -0.39         |
| P24158            | PRTN3            | Myeloblastin                               | 1.88E-02       | -0.80         |
| P27169            | PON1             | Serum paraoxonase/arylesterase 1           | 3.92E-02       | -0.29         |
| P35527            | KRT9             | Keratin, type I cytoskeletal 9             | 1.33E-02       | -2.02         |
| Q03591            | CFHR1            | Complement factor H-related protein 1      | 2.71E-02       | 0.43          |
| Q14623            | IHH              | Indian hedgehog protein                    | 6.74E-03       | -0.67         |
| Q15848            | ADIPOQ           | Adiponectin                                | 3.65E-02       | 0.72          |
| Q6DHV5            | CC2D2B           | Protein CC2D2B                             | 4.90E-02       | -0.30         |
| Q7Z794            | KRT77            | Keratin, type II cytoskeletal 1b           | 5.58E-04       | -1.75         |
| A0A125U0U6        | NA               | MS-A4 light chain variable region          | 1.28E-02       | -0.64         |
| A0A2U8J8H2        | NA               | Ig heavy chain variable region             | 4.23E-02       | -0.78         |
| A0A2U8J954        | NA               | Ig heavy chain variable region             | 2.77E-02       | 0.98          |

|            |    |                                                    |          |       |
|------------|----|----------------------------------------------------|----------|-------|
| A0A5C2FVM9 | NA | IGL c674_light_IGKV1D-13_IGKJ1                     | 2.11E-02 | -1.24 |
| A0A5C2GBH4 | NA | IGH c595_heavy_IGHV1-18_IGHD3-3_IGHJ6              | 7.19E-03 | -0.53 |
| A0A5C2GQG4 | NA | IG c780_heavy_IGHV3-11_IGHD4-23_IGHJ4              | 3.06E-02 | 0.54  |
| A2J1N0     | NA | Rheumatoid factor RF-IP14                          | 3.19E-02 | 0.44  |
| A2J422     | NA | Anti-HER3 scFv                                     | 3.19E-02 | -0.47 |
| A2N0U0     | NA | VH6DJ protein                                      | 4.06E-02 | -0.85 |
| A2NB46     | NA | Cold agglutinin FS-2 L-chain                       | 3.93E-02 | -0.36 |
| A2NZ55     | NA | Variable immunoglobulin anti-estradiol heavy chain | 1.83E-02 | -0.72 |
| G3GAU4     | NA | Anti-H1N1 influenza HA kappa chain variable region | 1.45E-02 | -0.70 |
| Q56G89     | NA | Serum albumin                                      | 1.13E-03 | 1.21  |
| Q6DHW4     | NA | Uncharacterized protein                            | 3.70E-03 | -2.09 |
| Q6MZU6     | NA | Uncharacterized protein DKFZp686C15213             | 4.84E-04 | -2.35 |

---

**Table S3 GO enrichment analysis results of biological process (qvalue < 0.05).**

| <b>ID</b>  | <b>Description</b>                                             | <b>GeneRatio</b> | <b>BgRatio</b> | <b>pvalue</b> | <b>p.adjust</b> | <b>qvalue</b> | <b>geneID</b>                  | <b>Count</b> |
|------------|----------------------------------------------------------------|------------------|----------------|---------------|-----------------|---------------|--------------------------------|--------------|
| GO:0006956 | complement activation                                          | 6/17             | 178/18866      | 7.36E-09      | 5.59E-06        | 3.23E-06      | C3/CRP/C9/KRT1/C8G/CFHR1       | 6            |
| GO:0006959 | humoral immune response                                        | 7/17             | 377/18866      | 1.97E-08      | 7.49E-06        | 4.32E-06      | C3/CRP/C9/KRT1/C8G/PRTN3/CFHR1 | 7            |
| GO:0006957 | complement activation, alternative pathway                     | 3/17             | 17/18866       | 4.10E-07      | 1.04E-04        | 6.00E-05      | C3/C9/C8G                      | 3            |
| GO:0019835 | cytolysis                                                      | 3/17             | 29/18866       | 2.19E-06      | 3.71E-04        | 2.15E-04      | C9/C8G/CFHR1                   | 3            |
| GO:0070268 | cornification                                                  | 4/17             | 113/18866      | 2.73E-06      | 3.71E-04        | 2.15E-04      | KRT14/KRT1/KRT9/KRT77          | 4            |
| GO:0030449 | regulation of complement activation                            | 4/17             | 115/18866      | 2.93E-06      | 3.71E-04        | 2.15E-04      | C3/C9/C8G/CFHR1                | 4            |
| GO:0002920 | regulation of humoral immune response                          | 4/17             | 134/18866      | 5.39E-06      | 5.85E-04        | 3.38E-04      | C3/C9/C8G/CFHR1                | 4            |
| GO:0006958 | complement activation, classical pathway                       | 4/17             | 141/18866      | 6.60E-06      | 6.27E-04        | 3.62E-04      | C3/CRP/C9/C8G                  | 4            |
| GO:0002455 | humoral immune response mediated by circulating immunoglobulin | 4/17             | 155/18866      | 9.60E-06      | 8.10E-04        | 4.68E-04      | C3/CRP/C9/C8G                  | 4            |
| GO:1905952 | regulation of lipid localization                               | 4/17             | 171/18866      | 1.41E-05      | 1.07E-03        | 6.21E-04      | C3/CRP/PON1/ADIPOQ             | 4            |
| GO:0010876 | lipid localization                                             | 5/17             | 440/18866      | 3.31E-05      | 2.29E-03        | 1.32E-03      | C3/CRP/LCAT/PON1/ADIPOQ        | 5            |
| GO:0031424 | keratinization                                                 | 4/17             | 225/18866      | 4.15E-05      | 2.45E-03        | 1.42E-03      | KRT14/KRT1/KRT9/KRT77          | 4            |
| GO:0016064 | immunoglobulin mediated immune                                 | 4/17             | 227/18866      | 4.30E-05      | 2.45E-03        | 1.42E-03      | C3/CRP/C9/C8G                  | 4            |

|            |                                                                           |      |           |          |          |          |                       |   |
|------------|---------------------------------------------------------------------------|------|-----------|----------|----------|----------|-----------------------|---|
| GO:0019724 | response<br>B cell mediated<br>immunity                                   | 4/17 | 230/18866 | 4.52E-05 | 2.45E-03 | 1.42E-03 | C3/CRP/C9/C8G         | 4 |
| GO:0010745 | negative regulation of<br>macrophage derived<br>foam cell differentiation | 2/17 | 13/18866  | 5.93E-05 | 3.00E-03 | 1.73E-03 | CRP/ADIPOQ            | 2 |
| GO:1905954 | positive regulation of<br>lipid localization                              | 3/17 | 94/18866  | 7.74E-05 | 3.68E-03 | 2.12E-03 | C3/PON1/ADIPOQ        | 3 |
| GO:0050764 | regulation of<br>phagocytosis                                             | 3/17 | 97/18866  | 8.50E-05 | 3.80E-03 | 2.20E-03 | C3/PRTN3/ADIPOQ       | 3 |
| GO:0030301 | cholesterol transport                                                     | 3/17 | 105/18866 | 1.08E-04 | 4.54E-03 | 2.62E-03 | LCAT/PON1/ADIPOQ      | 3 |
| GO:0030216 | keratinocyte<br>differentiation                                           | 4/17 | 306/18866 | 1.37E-04 | 5.47E-03 | 3.16E-03 | KRT14/KRT1/KRT9/KRT77 | 4 |
| GO:0010875 | positive regulation of<br>cholesterol efflux                              | 2/17 | 20/18866  | 1.44E-04 | 5.47E-03 | 3.16E-03 | PON1/ADIPOQ           | 2 |
| GO:0015918 | sterol transport                                                          | 3/17 | 118/18866 | 1.52E-04 | 5.51E-03 | 3.18E-03 | LCAT/PON1/ADIPOQ      | 3 |
| GO:0050765 | negative regulation of<br>phagocytosis                                    | 2/17 | 22/18866  | 1.75E-04 | 6.03E-03 | 3.49E-03 | PRTN3/ADIPOQ          | 2 |
| GO:0045109 | intermediate filament<br>organization                                     | 2/17 | 25/18866  | 2.26E-04 | 7.48E-03 | 4.32E-03 | KRT14/KRT9            | 2 |
| GO:0009913 | epidermal cell<br>differentiation                                         | 4/17 | 365/18866 | 2.69E-04 | 8.25E-03 | 4.77E-03 | KRT14/KRT1/KRT9/KRT77 | 4 |
| GO:0002449 | lymphocyte mediated<br>immunity                                           | 4/17 | 366/18866 | 2.71E-04 | 8.25E-03 | 4.77E-03 | C3/CRP/C9/C8G         | 4 |
| GO:0002460 | adaptive immune<br>response based on                                      | 4/17 | 370/18866 | 2.83E-04 | 8.27E-03 | 4.78E-03 | C3/CRP/C9/C8G         | 4 |

|            |                                                                                         |      |           |          |          |          |                       |  |   |
|------------|-----------------------------------------------------------------------------------------|------|-----------|----------|----------|----------|-----------------------|--|---|
|            | somatic recombination of immune receptors built from immunoglobulin superfamily domains |      |           |          |          |          |                       |  |   |
| GO:0032373 | positive regulation of sterol transport                                                 | 2/17 | 29/18866  | 3.06E-04 | 8.30E-03 | 4.80E-03 | PON1/ADIPOQ           |  | 2 |
| GO:0032376 | positive regulation of cholesterol transport                                            | 2/17 | 29/18866  | 3.06E-04 | 8.30E-03 | 4.80E-03 | PON1/ADIPOQ           |  | 2 |
| GO:0006909 | phagocytosis                                                                            | 4/17 | 382/18866 | 3.20E-04 | 8.37E-03 | 4.84E-03 | C3/CRP/PRTN3/ADIPOQ   |  | 4 |
| GO:0010743 | regulation of macrophage derived foam cell differentiation                              | 2/17 | 32/18866  | 3.73E-04 | 9.45E-03 | 5.46E-03 | CRP/ADIPOQ            |  | 2 |
| GO:0001906 | cell killing                                                                            | 3/17 | 172/18866 | 4.61E-04 | 1.13E-02 | 6.53E-03 | C3/C9/CFHR1           |  | 3 |
| GO:0043588 | skin development                                                                        | 4/17 | 425/18866 | 4.79E-04 | 1.14E-02 | 6.57E-03 | KRT14/KRT1/KRT9/KRT77 |  | 4 |
| GO:0010742 | macrophage derived foam cell differentiation                                            | 2/17 | 38/18866  | 5.27E-04 | 1.18E-02 | 6.81E-03 | CRP/ADIPOQ            |  | 2 |
| GO:0090077 | foam cell differentiation                                                               | 2/17 | 38/18866  | 5.27E-04 | 1.18E-02 | 6.81E-03 | CRP/ADIPOQ            |  | 2 |
| GO:0022408 | negative regulation of cell-cell adhesion                                               | 3/17 | 191/18866 | 6.26E-04 | 1.36E-02 | 7.85E-03 | CDH1/IHH/ADIPOQ       |  | 3 |
| GO:0002697 | regulation of immune effector process                                                   | 4/17 | 470/18866 | 6.99E-04 | 1.48E-02 | 8.53E-03 | C3/C9/C8G/CFHR1       |  | 4 |
| GO:0008544 | epidermis development                                                                   | 4/17 | 477/18866 | 7.39E-04 | 1.48E-02 | 8.54E-03 | KRT14/KRT1/KRT9/KRT77 |  | 4 |
| GO:0010828 | positive regulation of glucose transmembrane transport                                  | 2/17 | 45/18866  | 7.40E-04 | 1.48E-02 | 8.54E-03 | C3/ADIPOQ             |  | 2 |
| GO:0010874 | regulation of cholesterol                                                               | 2/17 | 46/18866  | 7.73E-04 | 1.51E-02 | 8.70E-03 | PON1/ADIPOQ           |  | 2 |

|            |                                                         |      |           |          |          |          |                     |   |  |
|------------|---------------------------------------------------------|------|-----------|----------|----------|----------|---------------------|---|--|
|            | efflux                                                  |      |           |          |          |          |                     |   |  |
| GO:0043312 | neutrophil degranulation                                | 4/17 | 487/18866 | 7.99E-04 | 1.52E-02 | 8.75E-03 | C3/KRT1/ANPEP/PRTN3 | 4 |  |
| GO:0002283 | neutrophil activation<br>involved in immune<br>response | 4/17 | 490/18866 | 8.17E-04 | 1.52E-02 | 8.75E-03 | C3/KRT1/ANPEP/PRTN3 | 4 |  |
| GO:0045104 | intermediate filament<br>cytoskeleton<br>organization   | 2/17 | 50/18866  | 9.13E-04 | 1.65E-02 | 9.54E-03 | KRT14/KRT9          | 2 |  |
| GO:0045103 | intermediate filament-<br>based process                 | 2/17 | 51/18866  | 9.49E-04 | 1.68E-02 | 9.69E-03 | KRT14/KRT9          | 2 |  |
| GO:0010883 | regulation of lipid storage                             | 2/17 | 52/18866  | 9.87E-04 | 1.70E-02 | 9.85E-03 | C3/CRP              | 2 |  |
| GO:0009636 | response to toxic<br>substance                          | 3/17 | 250/18866 | 1.36E-03 | 2.30E-02 | 1.33E-02 | CDH1/GPX3/PON1      | 3 |  |
| GO:0033344 | cholesterol efflux                                      | 2/17 | 64/18866  | 1.49E-03 | 2.46E-02 | 1.42E-02 | PON1/ADIPOQ         | 2 |  |
| GO:0015850 | organic hydroxy<br>compound transport                   | 3/17 | 268/18866 | 1.66E-03 | 2.69E-02 | 1.55E-02 | LCAT/PON1/ADIPOQ    | 3 |  |
| GO:0032370 | positive regulation of<br>lipid transport               | 2/17 | 70/18866  | 1.78E-03 | 2.76E-02 | 1.59E-02 | PON1/ADIPOQ         | 2 |  |
| GO:0032374 | regulation of cholesterol<br>transport                  | 2/17 | 70/18866  | 1.78E-03 | 2.76E-02 | 1.59E-02 | PON1/ADIPOQ         | 2 |  |
| GO:0032371 | regulation of sterol<br>transport                       | 2/17 | 71/18866  | 1.83E-03 | 2.78E-02 | 1.61E-02 | PON1/ADIPOQ         | 2 |  |
| GO:0010827 | regulation of glucose<br>transmembrane transport        | 2/17 | 79/18866  | 2.26E-03 | 3.32E-02 | 1.92E-02 | C3/ADIPOQ           | 2 |  |
| GO:0007162 | negative regulation of<br>cell adhesion                 | 3/17 | 301/18866 | 2.32E-03 | 3.32E-02 | 1.92E-02 | CDH1/IHH/ADIPOQ     | 3 |  |



|            |                                                       |      |           |          |          |          |                   |   |
|------------|-------------------------------------------------------|------|-----------|----------|----------|----------|-------------------|---|
| GO:0032945 | negative regulation of mononuclear cell proliferation | 2/17 | 80/18866  | 2.32E-03 | 3.32E-02 | 1.92E-02 | CRP/IHH           | 2 |
| GO:0019915 | lipid storage                                         | 2/17 | 81/18866  | 2.37E-03 | 3.34E-02 | 1.93E-02 | C3/CRP            | 2 |
| GO:0070664 | negative regulation of leukocyte proliferation        | 2/17 | 86/18866  | 2.67E-03 | 3.69E-02 | 2.13E-02 | CRP/IHH           | 2 |
| GO:0046470 | phosphatidylcholine metabolic process                 | 2/17 | 88/18866  | 2.80E-03 | 3.79E-02 | 2.19E-02 | LCAT/PON1         | 2 |
| GO:0070542 | response to fatty acid                                | 2/17 | 90/18866  | 2.92E-03 | 3.90E-02 | 2.25E-02 | PON1/ADIPOQ       | 2 |
| GO:0032677 | regulation of interleukin-8 production                | 2/17 | 93/18866  | 3.12E-03 | 4.01E-02 | 2.32E-02 | CRP/ADIPOQ        | 2 |
| GO:0051702 | interaction with symbiont                             | 2/17 | 93/18866  | 3.12E-03 | 4.01E-02 | 2.32E-02 | CRP/CFHR1         | 2 |
| GO:0032637 | interleukin-8 production                              | 2/17 | 101/18866 | 3.66E-03 | 4.64E-02 | 2.68E-02 | CRP/ADIPOQ        | 2 |
| GO:0097006 | regulation of plasma lipoprotein particle levels      | 2/17 | 105/18866 | 3.95E-03 | 4.81E-02 | 2.78E-02 | LCAT/ADIPOQ       | 2 |
| GO:1902106 | negative regulation of leukocyte differentiation      | 2/17 | 105/18866 | 3.95E-03 | 4.81E-02 | 2.78E-02 | IHH/ADIPOQ        | 2 |
| GO:0032091 | negative regulation of protein binding                | 2/17 | 106/18866 | 4.03E-03 | 4.81E-02 | 2.78E-02 | CFHR1/ADIPOQ      | 2 |
| GO:0051098 | regulation of binding                                 | 3/17 | 367/18866 | 4.05E-03 | 4.81E-02 | 2.78E-02 | PON1/CFHR1/ADIPOQ | 3 |

**Table S4 GO enrichment analysis results of cellular component.**

| <b>ID</b>  | <b>Description</b>                       | <b>GeneRatio</b> | <b>BgRatio</b> | <b>pvalue</b> | <b>p.adjust</b> | <b>qvalue</b> | <b>geneID</b>             | <b>Count</b> |
|------------|------------------------------------------|------------------|----------------|---------------|-----------------|---------------|---------------------------|--------------|
| GO:0072562 | blood microparticle                      | 6/17             | 148/19559      | 1.96E-09      | 1.02E-07        | 5.98E-08      | C3/C9/KRT1/C8G/PON1/CFHR1 | 6            |
| GO:0005882 | intermediate filament                    | 4/17             | 215/19559      | 3.02E-05      | 7.85E-04        | 4.61E-04      | KRT14/KRT1/KRT9/KRT77     | 4            |
| GO:0045111 | intermediate filament cytoskeleton       | 4/17             | 251/19559      | 5.53E-05      | 9.34E-04        | 5.48E-04      | KRT14/KRT1/KRT9/KRT77     | 4            |
| GO:0045095 | keratin filament                         | 3/17             | 95/19559       | 7.18E-05      | 9.34E-04        | 5.48E-04      | KRT14/KRT1/KRT77          | 3            |
| GO:0046930 | pore complex                             | 2/17             | 23/19559       | 1.78E-04      | 1.85E-03        | 1.09E-03      | C9/C8G                    | 2            |
| GO:0034364 | high-density lipoprotein particle        | 2/17             | 27/19559       | 2.46E-04      | 2.14E-03        | 1.25E-03      | LCAT/PON1                 | 2            |
| GO:0034358 | plasma lipoprotein particle              | 2/17             | 36/19559       | 4.40E-04      | 2.86E-03        | 1.68E-03      | LCAT/PON1                 | 2            |
| GO:1990777 | lipoprotein particle                     | 2/17             | 36/19559       | 4.40E-04      | 2.86E-03        | 1.68E-03      | LCAT/PON1                 | 2            |
| GO:0032994 | protein-lipid complex                    | 2/17             | 39/19559       | 5.17E-04      | 2.99E-03        | 1.75E-03      | LCAT/PON1                 | 2            |
| GO:0035578 | azurophil granule lumen                  | 2/17             | 91/19559       | 2.78E-03      | 1.45E-02        | 8.49E-03      | C3/PRTN3                  | 2            |
| GO:0044853 | plasma membrane raft                     | 2/17             | 113/19559      | 4.25E-03      | 2.01E-02        | 1.18E-02      | CDH1/PRTN3                | 2            |
| GO:0062023 | collagen-containing extracellular matrix | 3/17             | 427/19559      | 5.59E-03      | 2.42E-02        | 1.42E-02      | KRT1/PRTN3/ADIPOQ         | 3            |
| GO:0005766 | primary lysosome                         | 2/17             | 155/19559      | 7.85E-03      | 2.92E-02        | 1.71E-02      | C3/PRTN3                  | 2            |
| GO:0042582 | azurophil granule                        | 2/17             | 155/19559      | 7.85E-03      | 2.92E-02        | 1.71E-02      | C3/PRTN3                  | 2            |
| GO:0005775 | vacuolar lumen                           | 2/17             | 173/19559      | 9.69E-03      | 3.36E-02        | 1.97E-02      | C3/PRTN3                  | 2            |
| GO:0016342 | catenin complex                          | 1/17             | 31/19559       | 2.66E-02      | 8.09E-02        | 4.75E-02      | CDH1                      | 1            |
| GO:0034774 | secretory granule lumen                  | 2/17             | 322/19559      | 3.12E-02      | 8.09E-02        | 4.75E-02      | C3/PRTN3                  | 2            |
| GO:0060205 | cytoplasmic vesicle lumen                | 2/17             | 326/19559      | 3.19E-02      | 8.09E-02        | 4.75E-02      | C3/PRTN3                  | 2            |
| GO:0031983 | vesicle lumen                            | 2/17             | 328/19559      | 3.23E-02      | 8.09E-02        | 4.75E-02      | C3/PRTN3                  | 2            |
| GO:0045121 | membrane raft                            | 2/17             | 329/19559      | 3.25E-02      | 8.09E-02        | 4.75E-02      | CDH1/PRTN3                | 2            |

|            |                                                      |      |           |          |          |          |            |   |
|------------|------------------------------------------------------|------|-----------|----------|----------|----------|------------|---|
| GO:0098857 | membrane microdomain                                 | 2/17 | 330/19559 | 3.27E-02 | 8.09E-02 | 4.75E-02 | CDH1/PRTN3 | 2 |
| GO:0098589 | membrane region                                      | 2/17 | 343/19559 | 3.51E-02 | 8.29E-02 | 4.86E-02 | CDH1/PRTN3 | 2 |
| GO:0001533 | cornified envelope                                   | 1/17 | 45/19559  | 3.84E-02 | 8.69E-02 | 5.10E-02 | KRT1       | 1 |
| GO:0016328 | lateral plasma membrane                              | 1/17 | 65/19559  | 5.50E-02 | 1.19E-01 | 7.00E-02 | CDH1       | 1 |
| GO:0045178 | basal part of cell                                   | 1/17 | 69/19559  | 5.83E-02 | 1.21E-01 | 7.12E-02 | KRT14      | 1 |
| GO:0030864 | cortical actin cytoskeleton                          | 1/17 | 80/19559  | 6.73E-02 | 1.33E-01 | 7.80E-02 | CDH1       | 1 |
| GO:0005901 | caveola                                              | 1/17 | 82/19559  | 6.90E-02 | 1.33E-01 | 7.80E-02 | CDH1       | 1 |
| GO:0005581 | collagen trimer                                      | 1/17 | 87/19559  | 7.30E-02 | 1.36E-01 | 7.96E-02 | ADIPOQ     | 1 |
| GO:0030863 | cortical cytoskeleton                                | 1/17 | 106/19559 | 8.83E-02 | 1.58E-01 | 9.29E-02 | CDH1       | 1 |
| GO:0101002 | ficolin-1-rich granule                               | 1/17 | 124/19559 | 1.03E-01 | 1.72E-01 | 1.01E-01 | KRT1       | 1 |
| GO:1904813 | ficolin-1-rich granule lumen                         | 1/17 | 124/19559 | 1.03E-01 | 1.72E-01 | 1.01E-01 | KRT1       | 1 |
| GO:0005793 | endoplasmic reticulum-Golgi intermediate compartment | 1/17 | 130/19559 | 1.07E-01 | 1.74E-01 | 1.02E-01 | ANPEP      | 1 |
| GO:0043296 | apical junction complex                              | 1/17 | 143/19559 | 1.17E-01 | 1.85E-01 | 1.09E-01 | CDH1       | 1 |
| GO:0009898 | cytoplasmic side of plasma membrane                  | 1/17 | 164/19559 | 1.33E-01 | 2.00E-01 | 1.18E-01 | CDH1       | 1 |
| GO:0005912 | adherens junction                                    | 1/17 | 166/19559 | 1.35E-01 | 2.00E-01 | 1.18E-01 | CDH1       | 1 |
| GO:0019897 | extrinsic component of plasma membrane               | 1/17 | 172/19559 | 1.39E-01 | 2.01E-01 | 1.18E-01 | CDH1       | 1 |
| GO:0098562 | cytoplasmic side of membrane                         | 1/17 | 188/19559 | 1.51E-01 | 2.13E-01 | 1.25E-01 | CDH1       | 1 |
| GO:0030027 | lamellipodium                                        | 1/17 | 201/19559 | 1.61E-01 | 2.20E-01 | 1.29E-01 | CDH1       | 1 |
| GO:0005802 | trans-Golgi network                                  | 1/17 | 245/19559 | 1.93E-01 | 2.57E-01 | 1.51E-01 | CDH1       | 1 |
| GO:0005938 | cell cortex                                          | 1/17 | 305/19559 | 2.35E-01 | 2.86E-01 | 1.68E-01 | CDH1       | 1 |
| GO:0019898 | extrinsic component of membrane                      | 1/17 | 306/19559 | 2.35E-01 | 2.86E-01 | 1.68E-01 | CDH1       | 1 |
| GO:0030667 | secretory granule membrane                           | 1/17 | 306/19559 | 2.35E-01 | 2.86E-01 | 1.68E-01 | ANPEP      | 1 |

|            |                                     |      |           |          |          |          |       |   |
|------------|-------------------------------------|------|-----------|----------|----------|----------|-------|---|
| GO:0005788 | endoplasmic reticulum lumen         | 1/17 | 308/19559 | 2.37E-01 | 2.86E-01 | 1.68E-01 | C3    | 1 |
| GO:0098978 | glutamatergic synapse               | 1/17 | 361/19559 | 2.72E-01 | 3.10E-01 | 1.82E-01 | CDH1  | 1 |
| GO:0098791 | Golgi apparatus<br>subcompartment   | 1/17 | 368/19559 | 2.76E-01 | 3.10E-01 | 1.82E-01 | CDH1  | 1 |
| GO:0005765 | lysosomal membrane                  | 1/17 | 375/19559 | 2.81E-01 | 3.10E-01 | 1.82E-01 | ANPEP | 1 |
| GO:0098852 | lytic vacuole membrane              | 1/17 | 375/19559 | 2.81E-01 | 3.10E-01 | 1.82E-01 | ANPEP | 1 |
| GO:0031984 | organelle subcompartment            | 1/17 | 392/19559 | 2.91E-01 | 3.16E-01 | 1.85E-01 | CDH1  | 1 |
| GO:0009897 | external side of plasma<br>membrane | 1/17 | 417/19559 | 3.07E-01 | 3.19E-01 | 1.87E-01 | ANPEP | 1 |
| GO:0031252 | cell leading edge                   | 1/17 | 421/19559 | 3.09E-01 | 3.19E-01 | 1.87E-01 | CDH1  | 1 |
| GO:0005774 | vacuolar membrane                   | 1/17 | 427/19559 | 3.13E-01 | 3.19E-01 | 1.87E-01 | ANPEP | 1 |
| GO:0005911 | cell-cell junction                  | 1/17 | 493/19559 | 3.52E-01 | 3.52E-01 | 2.07E-01 | CDH1  | 1 |

---

**Table S5 GO enrichment analysis results of molecular function.**

| <b>ID</b>  | <b>Description</b>                                | <b>GeneRatio</b> | <b>BgRatio</b> | <b>pvalue</b> | <b>p.adjust</b> | <b>qvalue</b> | <b>geneID</b> | <b>Count</b> |
|------------|---------------------------------------------------|------------------|----------------|---------------|-----------------|---------------|---------------|--------------|
| GO:0001848 | complement binding                                | 2/16             | 21/18352       | 1.48E-04      | 9.49E-03        | 5.93E-03      | CRP/C8G       | 2            |
| GO:0005200 | structural constituent of cytoskeleton            | 2/16             | 104/18352      | 3.62E-03      | 8.11E-02        | 5.07E-02      | KRT14/KRT9    | 2            |
| GO:0052689 | carboxylic ester hydrolase activity               | 2/16             | 143/18352      | 6.74E-03      | 8.11E-02        | 5.07E-02      | LCAT/PON1     | 2            |
| GO:0045295 | gamma-catenin binding                             | 1/16             | 12/18352       | 1.04E-02      | 8.11E-02        | 5.07E-02      | CDH1          | 1            |
| GO:0030280 | structural constituent of skin epidermis          | 1/16             | 14/18352       | 1.21E-02      | 8.11E-02        | 5.07E-02      | KRT1          | 1            |
| GO:0032794 | GTPase activating protein binding                 | 1/16             | 14/18352       | 1.21E-02      | 8.11E-02        | 5.07E-02      | CDH1          | 1            |
| GO:0001846 | opsonin binding                                   | 1/16             | 15/18352       | 1.30E-02      | 8.11E-02        | 5.07E-02      | CRP           | 1            |
| GO:0019215 | intermediate filament binding                     | 1/16             | 15/18352       | 1.30E-02      | 8.11E-02        | 5.07E-02      | KRT14         | 1            |
| GO:0019841 | retinol binding                                   | 1/16             | 16/18352       | 1.39E-02      | 8.11E-02        | 5.07E-02      | C8G           | 1            |
| GO:0030169 | low-density lipoprotein particle binding          | 1/16             | 17/18352       | 1.47E-02      | 8.11E-02        | 5.07E-02      | CRP           | 1            |
| GO:0034185 | apolipoprotein binding                            | 1/16             | 17/18352       | 1.47E-02      | 8.11E-02        | 5.07E-02      | LCAT          | 1            |
| GO:0030506 | ankyrin binding                                   | 1/16             | 20/18352       | 1.73E-02      | 8.11E-02        | 5.07E-02      | CDH1          | 1            |
| GO:0004602 | glutathione peroxidase activity                   | 1/16             | 21/18352       | 1.82E-02      | 8.11E-02        | 5.07E-02      | GPX3          | 1            |
| GO:0050750 | low-density lipoprotein particle receptor binding | 1/16             | 21/18352       | 1.82E-02      | 8.11E-02        | 5.07E-02      | CRP           | 1            |
| GO:0033691 | sialic acid binding                               | 1/16             | 22/18352       | 1.90E-02      | 8.11E-02        | 5.07E-02      | ADIPOQ        | 1            |
| GO:0070006 | metalloaminopeptidase activity                    | 1/16             | 24/18352       | 2.07E-02      | 8.29E-02        | 5.18E-02      | ANPEP         | 1            |
| GO:0070325 | lipoprotein particle receptor binding             | 1/16             | 26/18352       | 2.24E-02      | 8.45E-02        | 5.28E-02      | CRP           | 1            |
| GO:0004806 | triglyceride lipase activity                      | 1/16             | 29/18352       | 2.50E-02      | 8.89E-02        | 5.55E-02      | LCAT          | 1            |
| GO:0071813 | lipoprotein particle binding                      | 1/16             | 34/18352       | 2.92E-02      | 9.25E-02        | 5.78E-02      | CRP           | 1            |
| GO:0071814 | protein-lipid complex binding                     | 1/16             | 34/18352       | 2.92E-02      | 9.25E-02        | 5.78E-02      | CRP           | 1            |

|            |                                                            |      |           |          |          |          |        |   |
|------------|------------------------------------------------------------|------|-----------|----------|----------|----------|--------|---|
| GO:0005501 | retinoid binding                                           | 1/16 | 36/18352  | 3.09E-02 | 9.25E-02 | 5.78E-02 | C8G    | 1 |
| GO:0019840 | isoprenoid binding                                         | 1/16 | 37/18352  | 3.18E-02 | 9.25E-02 | 5.78E-02 | C8G    | 1 |
| GO:0004177 | aminopeptidase activity                                    | 1/16 | 46/18352  | 3.94E-02 | 1.10E-01 | 6.85E-02 | ANPEP  | 1 |
| GO:0008374 | O-acyltransferase activity                                 | 1/16 | 50/18352  | 4.27E-02 | 1.14E-01 | 7.10E-02 | LCAT   | 1 |
| GO:0004601 | peroxidase activity                                        | 1/16 | 52/18352  | 4.44E-02 | 1.14E-01 | 7.10E-02 | GPX3   | 1 |
| GO:0016684 | oxidoreductase activity, acting on<br>peroxide as acceptor | 1/16 | 56/18352  | 4.77E-02 | 1.18E-01 | 7.34E-02 | GPX3   | 1 |
| GO:0008235 | metalloexopeptidase activity                               | 1/16 | 64/18352  | 5.44E-02 | 1.29E-01 | 8.06E-02 | ANPEP  | 1 |
| GO:0001618 | virus receptor activity                                    | 1/16 | 74/18352  | 6.26E-02 | 1.38E-01 | 8.64E-02 | ANPEP  | 1 |
| GO:0140272 | exogenous protein binding                                  | 1/16 | 74/18352  | 6.26E-02 | 1.38E-01 | 8.64E-02 | ANPEP  | 1 |
| GO:0008013 | beta-catenin binding                                       | 1/16 | 85/18352  | 7.16E-02 | 1.45E-01 | 9.05E-02 | CDH1   | 1 |
| GO:0016209 | antioxidant activity                                       | 1/16 | 86/18352  | 7.24E-02 | 1.45E-01 | 9.05E-02 | GPX3   | 1 |
| GO:0043178 | alcohol binding                                            | 1/16 | 86/18352  | 7.24E-02 | 1.45E-01 | 9.05E-02 | C8G    | 1 |
| GO:0008238 | exopeptidase activity                                      | 1/16 | 95/18352  | 7.97E-02 | 1.55E-01 | 9.66E-02 | ANPEP  | 1 |
| GO:0016407 | acetyltransferase activity                                 | 1/16 | 105/18352 | 8.78E-02 | 1.65E-01 | 1.03E-01 | LCAT   | 1 |
| GO:0005179 | hormone activity                                           | 1/16 | 122/18352 | 1.01E-01 | 1.85E-01 | 1.16E-01 | ADIPOQ | 1 |
| GO:0016298 | lipase activity                                            | 1/16 | 130/18352 | 1.08E-01 | 1.91E-01 | 1.20E-01 | LCAT   | 1 |
| GO:0019842 | vitamin binding                                            | 1/16 | 144/18352 | 1.18E-01 | 2.05E-01 | 1.28E-01 | C8G    | 1 |
| GO:0004252 | serine-type endopeptidase activity                         | 1/16 | 169/18352 | 1.38E-01 | 2.20E-01 | 1.38E-01 | PRTN3  | 1 |
| GO:0005201 | extracellular matrix structural<br>constituent             | 1/16 | 169/18352 | 1.38E-01 | 2.20E-01 | 1.38E-01 | ADIPOQ | 1 |
| GO:0004866 | endopeptidase inhibitor activity                           | 1/16 | 183/18352 | 1.48E-01 | 2.20E-01 | 1.38E-01 | C3     | 1 |
| GO:0008236 | serine-type peptidase activity                             | 1/16 | 187/18352 | 1.51E-01 | 2.20E-01 | 1.38E-01 | PRTN3  | 1 |
| GO:0008237 | metallopeptidase activity                                  | 1/16 | 189/18352 | 1.53E-01 | 2.20E-01 | 1.38E-01 | ANPEP  | 1 |
| GO:0030414 | peptidase inhibitor activity                               | 1/16 | 189/18352 | 1.53E-01 | 2.20E-01 | 1.38E-01 | C3     | 1 |
| GO:0017171 | serine hydrolase activity                                  | 1/16 | 191/18352 | 1.54E-01 | 2.20E-01 | 1.38E-01 | PRTN3  | 1 |

|            |                                                                             |      |           |          |          |          |        |   |
|------------|-----------------------------------------------------------------------------|------|-----------|----------|----------|----------|--------|---|
| GO:0061135 | endopeptidase regulator activity                                            | 1/16 | 192/18352 | 1.55E-01 | 2.20E-01 | 1.38E-01 | C3     | 1 |
| GO:0031406 | carboxylic acid binding                                                     | 1/16 | 212/18352 | 1.70E-01 | 2.36E-01 | 1.48E-01 | ADIPOQ | 1 |
| GO:0043177 | organic acid binding                                                        | 1/16 | 224/18352 | 1.78E-01 | 2.38E-01 | 1.49E-01 | ADIPOQ | 1 |
| GO:0016747 | transferase activity, transferring acyl groups other than amino-acyl groups | 1/16 | 229/18352 | 1.82E-01 | 2.38E-01 | 1.49E-01 | LCAT   | 1 |
| GO:0061134 | peptidase regulator activity                                                | 1/16 | 229/18352 | 1.82E-01 | 2.38E-01 | 1.49E-01 | C3     | 1 |
| GO:0005125 | cytokine activity                                                           | 1/16 | 235/18352 | 1.86E-01 | 2.39E-01 | 1.49E-01 | ADIPOQ | 1 |
| GO:0016746 | transferase activity, transferring acyl groups                              | 1/16 | 259/18352 | 2.03E-01 | 2.55E-01 | 1.60E-01 | LCAT   | 1 |
| GO:0030246 | carbohydrate binding                                                        | 1/16 | 267/18352 | 2.09E-01 | 2.57E-01 | 1.61E-01 | KRT1   | 1 |
| GO:0016791 | phosphatase activity                                                        | 1/16 | 277/18352 | 2.16E-01 | 2.61E-01 | 1.63E-01 | PON1   | 1 |
| GO:0001664 | G protein-coupled receptor binding                                          | 1/16 | 293/18352 | 2.27E-01 | 2.69E-01 | 1.68E-01 | C3     | 1 |
| GO:0042277 | peptide binding                                                             | 1/16 | 308/18352 | 2.37E-01 | 2.76E-01 | 1.73E-01 | ANPEP  | 1 |
| GO:0046982 | protein heterodimerization activity                                         | 1/16 | 321/18352 | 2.46E-01 | 2.81E-01 | 1.76E-01 | KRT1   | 1 |
| GO:0045296 | cadherin binding                                                            | 1/16 | 332/18352 | 2.53E-01 | 2.85E-01 | 1.78E-01 | CDH1   | 1 |
| GO:0042578 | phosphoric ester hydrolase activity                                         | 1/16 | 369/18352 | 2.78E-01 | 3.06E-01 | 1.91E-01 | PON1   | 1 |
| GO:0033218 | amide binding                                                               | 1/16 | 381/18352 | 2.85E-01 | 3.06E-01 | 1.91E-01 | ANPEP  | 1 |
| GO:0004857 | enzyme inhibitor activity                                                   | 1/16 | 383/18352 | 2.87E-01 | 3.06E-01 | 1.91E-01 | C3     | 1 |
| GO:0004175 | endopeptidase activity                                                      | 1/16 | 440/18352 | 3.22E-01 | 3.38E-01 | 2.11E-01 | PRTN3  | 1 |
| GO:0005543 | phospholipid binding                                                        | 1/16 | 454/18352 | 3.30E-01 | 3.41E-01 | 2.13E-01 | PON1   | 1 |
| GO:0048018 | receptor ligand activity                                                    | 1/16 | 487/18352 | 3.50E-01 | 3.53E-01 | 2.20E-01 | ADIPOQ | 1 |
| GO:0030546 | signaling receptor activator activity                                       | 1/16 | 492/18352 | 3.53E-01 | 3.53E-01 | 2.20E-01 | ADIPOQ | 1 |

**Table S6 KEGG enrichment analysis results in proteomics.**

| #Term                                  | Database     | ID       | Input number | Background number | P-Value  | Corrected P-Value | Input       |
|----------------------------------------|--------------|----------|--------------|-------------------|----------|-------------------|-------------|
| Complement and coagulation cascades    | KEGG PATHWAY | hsa04610 | 3            | 79                | 7.00E-06 | 3.15E-04          | 733 735 718 |
| Systemic lupus erythematosus           | KEGG PATHWAY | hsa05322 | 3            | 133               | 3.19E-05 | 7.18E-04          | 733 735 718 |
| Prion diseases                         | KEGG PATHWAY | hsa05020 | 2            | 35                | 1.31E-04 | 1.96E-03          | 733 735     |
| Glutathione metabolism                 | KEGG PATHWAY | hsa00480 | 2            | 56                | 3.23E-04 | 3.64E-03          | 2878 290    |
| Amoebiasis                             | KEGG PATHWAY | hsa05146 | 2            | 95                | 9.01E-04 | 8.11E-03          | 733 735     |
| Estrogen signaling pathway             | KEGG PATHWAY | hsa04915 | 2            | 138               | 1.86E-03 | 1.40E-02          | 3857 3861   |
| Renin-angiotensin system               | KEGG PATHWAY | hsa04614 | 1            | 23                | 1.09E-02 | 6.25E-02          | 290         |
| Thyroid cancer                         | KEGG PATHWAY | hsa05216 | 1            | 37                | 1.73E-02 | 6.25E-02          | 999         |
| Bladder cancer                         | KEGG PATHWAY | hsa05219 | 1            | 41                | 1.91E-02 | 6.25E-02          | 999         |
| Type II diabetes mellitus              | KEGG PATHWAY | hsa04930 | 1            | 46                | 2.13E-02 | 6.25E-02          | 9370        |
| Hedgehog signaling pathway             | KEGG PATHWAY | hsa04340 | 1            | 47                | 2.18E-02 | 6.25E-02          | 3549        |
| Cholesterol metabolism                 | KEGG PATHWAY | hsa04979 | 1            | 50                | 2.31E-02 | 6.25E-02          | 3931        |
| Pathogenic Escherichia coli infection  | KEGG PATHWAY | hsa05130 | 1            | 55                | 2.54E-02 | 6.25E-02          | 999         |
| Legionellosis                          | KEGG PATHWAY | hsa05134 | 1            | 55                | 2.54E-02 | 6.25E-02          | 718         |
| Endometrial cancer                     | KEGG PATHWAY | hsa05213 | 1            | 58                | 2.67E-02 | 6.25E-02          | 999         |
| Arachidonic acid metabolism            | KEGG PATHWAY | hsa00590 | 1            | 63                | 2.89E-02 | 6.25E-02          | 2878        |
| Staphylococcus aureus infection        | KEGG PATHWAY | hsa05150 | 1            | 68                | 3.12E-02 | 6.25E-02          | 718         |
| Adipocytokine signaling pathway        | KEGG PATHWAY | hsa04920 | 1            | 69                | 3.16E-02 | 6.25E-02          | 9370        |
| Adherens junction                      | KEGG PATHWAY | hsa04520 | 1            | 72                | 3.30E-02 | 6.25E-02          | 999         |
| Melanoma                               | KEGG PATHWAY | hsa05218 | 1            | 72                | 3.30E-02 | 6.25E-02          | 999         |
| Bacterial invasion of epithelial cells | KEGG PATHWAY | hsa05100 | 1            | 74                | 3.38E-02 | 6.25E-02          | 999         |
| Thyroid hormone synthesis              | KEGG PATHWAY | hsa04918 | 1            | 74                | 3.38E-02 | 6.25E-02          | 2878        |



|                                                 |              |          |   |      |          |          |          |
|-------------------------------------------------|--------------|----------|---|------|----------|----------|----------|
| Leishmaniasis                                   | KEGG PATHWAY | hsa05140 | 1 | 74   | 3.38E-02 | 6.25E-02 | 718      |
| Pertussis                                       | KEGG PATHWAY | hsa05133 | 1 | 76   | 3.47E-02 | 6.25E-02 | 718      |
| PPAR signaling pathway                          | KEGG PATHWAY | hsa03320 | 1 | 76   | 3.47E-02 | 6.25E-02 | 9370     |
| Longevity regulating pathway                    | KEGG PATHWAY | hsa04211 | 1 | 89   | 4.05E-02 | 7.01E-02 | 9370     |
| Glycerophospholipid metabolism                  | KEGG PATHWAY | hsa00564 | 1 | 97   | 4.40E-02 | 7.07E-02 | 3931     |
| Hematopoietic cell lineage                      | KEGG PATHWAY | hsa04640 | 1 | 97   | 4.40E-02 | 7.07E-02 | 290      |
| Chagas disease (American trypanosomiasis)       | KEGG PATHWAY | hsa05142 | 1 | 103  | 4.66E-02 | 7.24E-02 | 718      |
| AMPK signaling pathway                          | KEGG PATHWAY | hsa04152 | 1 | 120  | 5.41E-02 | 8.11E-02 | 9370     |
| Apelin signaling pathway                        | KEGG PATHWAY | hsa04371 | 1 | 137  | 6.14E-02 | 8.59E-02 | 999      |
| Cell adhesion molecules (CAMs)                  | KEGG PATHWAY | hsa04514 | 1 | 146  | 6.53E-02 | 8.59E-02 | 999      |
| Non-alcoholic fatty liver disease (NAFLD)       | KEGG PATHWAY | hsa04932 | 1 | 149  | 6.66E-02 | 8.59E-02 | 9370     |
| Gastric cancer                                  | KEGG PATHWAY | hsa05226 | 1 | 149  | 6.66E-02 | 8.59E-02 | 999      |
| Phagosome                                       | KEGG PATHWAY | hsa04145 | 1 | 152  | 6.79E-02 | 8.59E-02 | 718      |
| Hippo signaling pathway                         | KEGG PATHWAY | hsa04390 | 1 | 154  | 6.87E-02 | 8.59E-02 | 999      |
| Tuberculosis                                    | KEGG PATHWAY | hsa05152 | 1 | 179  | 7.94E-02 | 9.66E-02 | 718      |
| Kaposi sarcoma-associated herpesvirus infection | KEGG PATHWAY | hsa05167 | 1 | 186  | 8.24E-02 | 9.75E-02 | 718      |
| Viral carcinogenesis                            | KEGG PATHWAY | hsa05203 | 1 | 201  | 8.87E-02 | 1.01E-01 | 718      |
| Proteoglycans in cancer                         | KEGG PATHWAY | hsa05205 | 1 | 203  | 8.95E-02 | 1.01E-01 | 3549     |
| Rap1 signaling pathway                          | KEGG PATHWAY | hsa04015 | 1 | 210  | 9.25E-02 | 1.01E-01 | 999      |
| Metabolic pathways                              | KEGG PATHWAY | hsa01100 | 2 | 1433 | 1.39E-01 | 1.49E-01 | 2878 290 |
| Neuroactive ligand-receptor interaction         | KEGG PATHWAY | hsa04080 | 1 | 338  | 1.45E-01 | 1.51E-01 | 718      |
| Herpes simplex virus 1 infection                | KEGG PATHWAY | hsa05168 | 1 | 492  | 2.03E-01 | 2.08E-01 | 718      |
| Pathways in cancer                              | KEGG PATHWAY | hsa05200 | 1 | 530  | 2.17E-01 | 2.17E-01 | 999      |

**Table S7 Differentially changed metabolites.**

| Name                                                                                 | Formula            | Molecular Weight | RT  | KEG G ID   | HMDB ID         | Endogenous/Exogenous | VI P     | p value      | p.adj ust    |
|--------------------------------------------------------------------------------------|--------------------|------------------|-----|------------|-----------------|----------------------|----------|--------------|--------------|
| Octaethylene glycol                                                                  | C16 H34 O9         | 370.22           | 4.4 | null       | HMDB00<br>94680 | Exogenous            | 2.<br>52 | 4.93E<br>-11 | 2.94E<br>-08 |
| Heptaethylene glycol                                                                 | C14 H30 O8         | 326.19           | 4.1 | null       | HMDB00<br>61835 | Exogenous            | 2.<br>51 | 1.08E<br>-10 | 3.88E<br>-08 |
| Netilmicin                                                                           | C21 H41 N5<br>O7   | 475.30           | 4.8 | C0765<br>7 | HMDB00<br>15090 | Exogenous            | 2.<br>49 | 2.51E<br>-10 | 6.42E<br>-08 |
| PA(22:6(4Z,7Z,10Z,13Z,16Z,19Z)/20:5(5Z,8Z,11Z,14Z,17Z))                              | C45 H67 O8<br>P    | 766.46           | 5.7 | null       | HMDB01<br>15418 | Exogenous            | 2.<br>46 | 7.02E<br>-10 | 1.16E<br>-07 |
| Ibutilide                                                                            | C20 H36 N2<br>O3 S | 384.25           | 5.6 | C0775<br>3 | HMDB00<br>14453 | Exogenous            | 2.<br>44 | 1.28E<br>-09 | 1.85E<br>-07 |
| Histidiny-Proline                                                                    | C11 H16 N4<br>O3   | 252.12           | 3.5 | null       | HMDB00<br>28893 | Endogenous           | 2.<br>44 | 3.31E<br>-09 | 3.39E<br>-07 |
| PE(18:4(6Z,9Z,12Z,15Z)/22:6(4Z,7Z,10Z,13Z,16Z,19Z))                                  | C45 H70 N<br>O8 P  | 783.48           | 5.7 | C0035<br>0 | HMDB00<br>09210 | Endogenous           | 2.<br>43 | 3.21E<br>-09 | 3.38E<br>-07 |
| 5'-(3',4'-Dihydroxyphenyl)-gamma-valerolactone sulfate                               | C11 H12 O7<br>S    | 288.03           | 3.2 | null       | HMDB00<br>29191 | Endogenous           | 2.<br>39 | 1.06E<br>-08 | 8.62E<br>-07 |
| Hexaethylene glycol                                                                  | C12 H26 O7         | 282.17           | 3.9 | null       | HMDB00<br>61822 | Exogenous            | 2.<br>38 | 1.50E<br>-08 | 1.15E<br>-06 |
| Labetalol                                                                            | C19 H24 N2<br>O3   | 328.18           | 5.4 | C0706<br>0 | HMDB00<br>14736 | Exogenous            | 2.<br>29 | 1.83E<br>-07 | 1.00E<br>-05 |
| 5-(5,7-dihydroxy-4-oxo-3,4-dihydro-2h-chromen-2-yl)-2-hydroxyphenyl hydrogen sulfate | C15 H12 O9<br>S    | 368.02           | 5.2 | null       | HMDB01<br>33374 | Exogenous            | 2.<br>20 | 2.57E<br>-06 | 1.16E<br>-04 |

|                                                                               |                    |        |     |       |        |            |    |       |       |
|-------------------------------------------------------------------------------|--------------------|--------|-----|-------|--------|------------|----|-------|-------|
| 4-ethylphenylsulfate                                                          | C8 H10 O4 S        | 202.03 | 3.0 | null  | HMDB00 | Endogenous | 2. | 1.85E | 8.62E |
|                                                                               |                    |        | 8   |       | 62551  |            | 17 | -06   | -05   |
| Dambonitol                                                                    | C8 H16 O6          | 208.09 | 3.1 | null  | HMDB00 | Exogenous  | 2. | 2.89E | 1.28E |
|                                                                               |                    |        | 0   |       | 33942  |            | 17 | -06   | -04   |
| hesperetin 3'-O-sulfate                                                       | C16 H14 O9<br>S    | 382.04 | 5.4 | null  | HMDB00 | Exogenous  | 2. | 1.06E | 5.26E |
|                                                                               |                    |        | 8   |       | 29202  |            | 16 | -06   | -05   |
| Paraldehyde                                                                   | C6 H12 O3          | 132.08 | 3.1 | C0783 | HMDB00 | Exogenous  | 2. | 7.81E | 3.13E |
|                                                                               |                    |        | 3   | 4     | 32456  |            | 11 | -06   | -04   |
| 3-Oxo-carbofuran                                                              | C12 H13 N<br>O4    | 235.09 | 2.2 | null  | HMDB00 | Endogenous | 2. | 6.74E | 2.78E |
|                                                                               |                    |        | 5   |       | 32776  |            | 10 | -06   | -04   |
| Methyl dihydrojasmonate                                                       | C13 H22 O3         | 226.16 | 8.3 | null  | HMDB00 | Exogenous  | 2. | 1.82E | 6.31E |
|                                                                               |                    |        | 5   |       | 31740  |            | 06 | -05   | -04   |
| Tetraethylene glycol                                                          | C8 H18 O5          | 194.12 | 3.1 | null  | HMDB00 | Exogenous  | 2. | 2.44E | 7.89E |
|                                                                               |                    |        | 4   |       | 94708  |            | 03 | -05   | -04   |
| Ovalicin                                                                      | C16 H24 O5         | 296.16 | 2.2 | null  | HMDB00 | Exogenous  | 1. | 4.54E | 1.30E |
|                                                                               |                    |        | 0   |       | 38120  |            | 97 | -05   | -03   |
| (2e)-3-(6,7-dimethoxy-1,3-benzodioxol-5-yl)-2-propen-1-yl<br>hydrogen sulfate | C12 H14 O8<br>S    | 318.04 | 3.5 | null  | HMDB01 | Exogenous  | 1. | 4.85E | 1.36E |
|                                                                               |                    |        | 3   |       | 28688  |            | 96 | -05   | -03   |
| Losartan                                                                      | C22 H23 Cl<br>N6 O | 422.16 | 8.4 | C0707 | HMDB00 | Exogenous  | 1. | 1.89E | 6.52E |
|                                                                               |                    |        | 5   | 2     | 14816  |            | 96 | -05   | -04   |
| Methylgallic acid-O-sulphate                                                  | C8 H8 O8 S         | 263.99 | 3.7 | null  | HMDB00 | Exogenous  | 1. | 5.96E | 1.61E |
|                                                                               |                    |        | 7   |       | 60005  |            | 96 | -05   | -03   |
| 2-tert-Butyl-1,4-benzenediol                                                  | C10 H14 O2         | 166.10 | 4.9 | null  | HMDB00 | Exogenous  | 1. | 8.85E | 2.08E |
|                                                                               |                    |        | 6   |       | 32062  |            | 95 | -05   | -03   |
| Tyrosyl-Phenylalanine                                                         | C18 H20 N2<br>O4   | 328.14 | 10. | null  | HMDB00 | Endogenous | 1. | 8.06E | 1.98E |
|                                                                               |                    |        | 08  |       | 29112  |            | 95 | -05   | -03   |

|                                                       |             |        |     |       |        |            |    |       |       |
|-------------------------------------------------------|-------------|--------|-----|-------|--------|------------|----|-------|-------|
| Leukotriene B4                                        | C20 H32 O4  | 336.23 | 7.9 | C0216 | HMDB00 | Endogenous | 1. | 8.72E | 2.06E |
|                                                       |             |        | 0   | 5     | 01085  |            | 93 | -05   | -03   |
| Sulfoxone                                             | C14 H16 N2  | 404.02 | 5.4 | null  | HMDB00 | Exogenous  | 1. | 5.25E | 1.45E |
|                                                       | O6 S3       |        | 8   |       | 15276  |            | 90 | -05   | -03   |
| beta-Boswellic acid acetate                           | C32 H50 O4  | 498.37 | 10. | null  | HMDB00 | Exogenous  | 1. | 8.44E | 2.03E |
|                                                       |             |        | 17  |       | 35160  |            | 89 | -05   | -03   |
| Traumatic acid                                        | C12 H20 O4  | 228.14 | 5.6 | C1630 | HMDB00 | Exogenous  | 1. | 1.04E | 2.42E |
|                                                       |             |        | 8   | 8     | 00933  |            | 89 | -04   | -03   |
| 2-sulfosuccinic acid                                  | C4 H6 O7 S  | 197.98 | 0.6 | null  | HMDB00 | Exogenous  | 1. | 1.12E | 2.56E |
|                                                       |             |        | 1   |       | 40585  |            | 89 | -04   | -03   |
| Paraxanthine                                          | C7 H8 N4 O2 | 180.07 | 3.4 | C1374 | HMDB00 | Endogenous | 1. | 1.26E | 2.82E |
|                                                       |             |        | 2   | 7     | 01860  |            | 86 | -04   | -03   |
| Dimethylphosphate                                     | C2 H7 O4 P  | 126.01 | 0.6 | null  | HMDB00 | Exogenous  | 1. | 2.81E | 5.21E |
|                                                       |             |        | 9   |       | 61734  |            | 85 | -04   | -03   |
| 3,3'-Thiobispropanoic acid                            | C6 H10 O4 S | 178.03 | 1.0 | null  | HMDB00 | Exogenous  | 1. | 2.25E | 4.51E |
|                                                       |             |        | 9   |       | 31162  |            | 83 | -04   | -03   |
| Ethylene brassylate                                   | C15 H26 O4  | 270.18 | 7.6 | null  | HMDB00 | Exogenous  | 1. | 2.86E | 5.24E |
|                                                       |             |        | 5   |       | 40459  |            | 83 | -04   | -03   |
| (2E)-2-methyl-3-phenyl-2-propen-1-yl hydrogen sulfate | C10 H12 O4  | 228.05 | 6.1 | null  | HMDB01 | Exogenous  | 1. | 2.11E | 4.36E |
|                                                       | S           |        | 7   |       | 33620  |            | 83 | -04   | -03   |
| Indolylacryloylglycine                                | C13 H12 N2  | 244.08 | 3.5 | null  | HMDB00 | Exogenous  | 1. | 3.79E | 6.36E |
|                                                       | O3          |        | 4   |       | 06005  |            | 83 | -04   | -03   |
| Pregnanetriol                                         | C21 H36 O3  | 336.27 | 9.2 | null  | HMDB00 | Endogenous | 1. | 3.63E | 6.16E |
|                                                       |             |        | 4   |       | 06070  |            | 81 | -04   | -03   |
| Tripropylamine                                        | C9 H21 N    | 143.17 | 3.2 | null  | HMDB00 | Exogenous  | 1. | 3.20E | 5.62E |
|                                                       |             |        | 8   |       | 32545  |            | 80 | -04   | -03   |

|                                                                          |                 |        |     |       |        |            |    |       |       |
|--------------------------------------------------------------------------|-----------------|--------|-----|-------|--------|------------|----|-------|-------|
| Theophylline                                                             | C7 H8 N4 O2     | 180.06 | 3.5 | C0713 | HMDB00 | Exogenous  | 1. | 2.50E | 4.89E |
|                                                                          |                 |        | 8   | 0     | 01889  |            | 80 | -04   | -03   |
| 1,4-dihydroxy-1-(1-oxo-1h-isochromen-3-yl)-2-butanyl<br>hydrogen sulfate | C13 H14 O8<br>S | 330.04 | 2.1 | null  | HMDB01 | Exogenous  | 1. | 3.86E | 6.45E |
|                                                                          |                 |        | 8   |       | 30090  |            | 79 | -04   | -03   |
| Sulcatone                                                                | C8 H14 O        | 126.10 | 5.4 | C0728 | HMDB00 | Exogenous  | 1. | 3.79E | 6.36E |
|                                                                          |                 |        | 0   | 7     | 35915  |            | 79 | -04   | -03   |
| 4-vinylguaiacol sulfate                                                  | C9 H10 O5 S     | 230.02 | 4.8 | null  | HMDB01 | Exogenous  | 1. | 7.52E | 1.08E |
|                                                                          |                 |        | 6   |       | 27980  |            | 79 | -04   | -02   |
| 4-(1,2-dihydroxy-2-propanyl)-1-methyl-1,2-<br>cyclohexanediol            | C10 H20 O4      | 204.14 | 4.9 | null  | HMDB00 | Exogenous  | 1. | 2.81E | 5.21E |
|                                                                          |                 |        | 7   |       | 39974  |            | 78 | -04   | -03   |
| 3-Acetyl-2,5-dimethylfuran                                               | C8 H10 O2       | 138.07 | 5.0 | null  | HMDB00 | Exogenous  | 1. | 6.82E | 1.01E |
|                                                                          |                 |        | 4   |       | 29563  |            | 78 | -04   | -02   |
| 1,7-Dimethyluric acid                                                    | C7 H8 N4 O3     | 196.06 | 2.3 | C1635 | HMDB00 | Endogenous | 1. | 3.12E | 5.55E |
|                                                                          |                 |        | 9   | 6     | 11103  |            | 78 | -04   | -03   |
| 10-Hydroxy-octadec-12Z-enoate-9-beta-D-glucuronide                       | C24 H42<br>O10  | 490.28 | 7.6 | null  | HMDB00 | Endogenous | 1. | 3.99E | 3.49E |
|                                                                          |                 |        | 9   |       | 60120  |            | 77 | -03   | -02   |
| 2,4,12-Octadecatrienoic acid isobutylamide                               | C22 H39 N O     | 333.30 | 9.1 | null  | HMDB00 | Exogenous  | 1. | 3.73E | 3.35E |
|                                                                          |                 |        | 9   |       | 32033  |            | 77 | -03   | -02   |
| Ethyl 3-oxohexanoate                                                     | C8 H14 O3       | 158.09 | 5.2 | C0297 | HMDB00 | Exogenous  | 1. | 7.46E | 1.07E |
|                                                                          |                 |        | 3   | 5     | 31307  |            | 76 | -04   | -02   |
| Hesperetin                                                               | C16 H14 O6      | 302.08 | 5.6 | C0170 | HMDB00 | Exogenous  | 1. | 2.31E | 4.59E |
|                                                                          |                 |        | 3   | 9     | 05782  |            | 76 | -04   | -03   |
| Gamma-Linolenic acid                                                     | C18 H30 O2      | 278.22 | 8.8 | C0642 | HMDB00 | Endogenous | 1. | 6.62E | 9.87E |
|                                                                          |                 |        | 4   | 6     | 03073  |            | 76 | -04   | -03   |
| 2-hydroxypropanoic acid                                                  | C3 H6 O3        | 90.03  | 0.7 | C0143 | HMDB01 | Endogenous | 1. | 4.93E | 7.80E |
|                                                                          |                 |        | 0   | 2     | 44295  |            | 76 | -04   | -03   |

|                              |               |        |     |       |        |            |    |       |       |
|------------------------------|---------------|--------|-----|-------|--------|------------|----|-------|-------|
| Pentadecanoic acid           | C15 H30 O2    | 242.22 | 9.9 | C1653 | HMDB00 | Endogenous | 1. | 5.07E | 7.91E |
|                              |               |        | 9   | 7     | 00826  |            | 75 | -04   | -03   |
| anhydroretinol               | C20 H28       | 268.22 | 7.6 | null  | HMDB00 | Exogenous  | 1. | 2.25E | 4.51E |
|                              |               |        | 3   |       | 62447  |            | 74 | -04   | -03   |
| Thiomorpholine 3-carboxylate | C5 H9 N O2    | 147.04 | 1.1 | C0390 | HMDB00 | Exogenous  | 1. | 9.63E | 1.30E |
|                              | S             |        | 0   | 1     | 59611  |            | 73 | -04   | -02   |
| (2XI)-d-gluco-heptonic acid  | C7 H14 O8     | 226.07 | 0.7 | null  | HMDB02 | Endogenous | 1. | 1.24E | 1.55E |
|                              |               |        | 1   |       | 40292  |            | 71 | -03   | -02   |
| Persin                       | C23 H40 O4    | 380.29 | 9.6 | null  | HMDB00 | Exogenous  | 1. | 7.00E | 1.02E |
|                              |               |        | 3   |       | 41103  |            | 71 | -04   | -02   |
| Isobutyric acid              | C4 H8 O2      | 88.05  | 3.5 | C0263 | HMDB00 | Exogenous  | 1. | 2.42E | 4.76E |
|                              |               |        | 6   | 2     | 01873  |            | 71 | -04   | -03   |
| Momordol                     | C26 H48 O5    | 440.35 | 10. | null  | HMDB00 | Exogenous  | 1. | 6.21E | 9.42E |
|                              |               |        | 03  |       | 29804  |            | 71 | -04   | -03   |
| Caproic acid                 | C6 H12 O2     | 116.08 | 5.5 | C0158 | HMDB00 | Endogenous | 1. | 1.09E | 1.41E |
|                              |               |        | 8   | 5     | 00535  |            | 69 | -03   | -02   |
| Methyprylon                  | C10 H17 N O2  | 183.13 | 4.5 | null  | HMDB00 | Exogenous  | 1. | 8.83E | 1.21E |
|                              |               |        | 1   |       | 15239  |            | 69 | -04   | -02   |
| Erythrasinate A              | C38 H66 O4    | 586.49 | 10. | null  | HMDB00 | Exogenous  | 1. | 7.86E | 1.11E |
|                              |               |        | 34  |       | 38713  |            | 69 | -04   | -02   |
| Nifedipine                   | C17 H18 N2 O6 | 346.12 | 4.6 | C0726 | HMDB00 | Exogenous  | 1. | 9.87E | 1.32E |
|                              |               |        | 1   | 6     | 15247  |            | 69 | -04   | -02   |
| Trihydroxycoprostanic acid   | C28 H48 O5    | 464.35 | 9.3 | null  | HMDB00 | Exogenous  | 1. | 7.81E | 1.11E |
|                              |               |        | 9   |       | 02163  |            | 68 | -04   | -02   |
| Valyl-Valine                 | C10 H20 N2 O3 | 216.15 | 5.2 | null  | HMDB00 | Exogenous  | 1. | 1.23E | 1.55E |
|                              |               |        | 9   |       | 29140  |            | 68 | -03   | -02   |

|                                                                                  |                |        |     |       |        |            |    |       |       |
|----------------------------------------------------------------------------------|----------------|--------|-----|-------|--------|------------|----|-------|-------|
| Linoleamide                                                                      | C18 H33 N O    | 279.26 | 7.9 | null  | HMDB00 | Endogenous | 1. | 1.40E | 1.69E |
|                                                                                  |                |        | 6   |       | 62656  |            | 66 | -03   | -02   |
| Oleic acid                                                                       | C18 H34 O2     | 282.26 | 9.9 | C0071 | HMDB00 | Exogenous  | 1. | 1.43E | 1.71E |
|                                                                                  |                |        | 8   | 2     | 00207  |            | 66 | -03   | -02   |
| Perfluorooctanoic acid                                                           | C8 H F15 O2    | 413.97 | 7.8 | null  | HMDB00 | Exogenous  | 1. | 1.28E | 1.57E |
|                                                                                  |                |        | 3   |       | 59587  |            | 66 | -03   | -02   |
| 24-Epibrassinolide                                                               | C28 H48 O6     | 480.34 | 9.3 | null  | HMDB00 | Exogenous  | 1. | 1.09E | 1.41E |
|                                                                                  |                |        | 1   |       | 41130  |            | 66 | -03   | -02   |
| Oleoyl glycine                                                                   | C20 H37 N O3   | 339.28 | 8.8 | null  | HMDB00 | Endogenous | 1. | 1.67E | 1.94E |
|                                                                                  |                |        | 5   |       | 13631  |            | 65 | -03   | -02   |
| 1-Methylxanthine                                                                 | C6 H6 N4 O2    | 166.05 | 2.6 | C1635 | HMDB00 | Endogenous | 1. | 1.03E | 1.36E |
|                                                                                  |                |        | 4   | 8     | 10738  |            | 64 | -03   | -02   |
| Capryloylglycine                                                                 | C10 H19 N O3   | 201.14 | 5.7 | null  | HMDB00 | Endogenous | 1. | 1.32E | 1.62E |
|                                                                                  |                |        | 7   |       | 00832  |            | 64 | -03   | -02   |
| LysoPE(18:2(9Z,12Z)/0:0)                                                         | C23 H44 N O7 P | 477.28 | 9.7 | null  | HMDB00 | Endogenous | 1. | 1.67E | 1.94E |
|                                                                                  |                |        | 5   |       | 11507  |            | 64 | -03   | -02   |
| 4-(8-hydroxy-7-methoxy-4-oxo-3,4-dihydro-2H-chromen-2-yl)phenyl hydrogen sulfate | C16 H14 O8 S   | 366.04 | 6.3 | null  | HMDB01 | Exogenous  | 1. | 1.73E | 1.99E |
|                                                                                  |                |        | 8   |       | 33303  |            | 64 | -03   | -02   |
| Mitotane                                                                         | C14 H10 Cl4    | 317.95 | 0.7 | null  | HMDB00 | Exogenous  | 1. | 1.24E | 1.55E |
|                                                                                  |                |        | 9   |       | 14786  |            | 64 | -03   | -02   |
| Acetyl hexamethyl tetralin                                                       | C18 H26 O      | 258.20 | 9.4 | null  | HMDB00 | Exogenous  | 1. | 1.81E | 2.04E |
|                                                                                  |                |        | 0   |       | 61860  |            | 62 | -03   | -02   |
| Pregnenolone                                                                     | C21 H32 O2     | 316.24 | 8.1 | C0195 | HMDB00 | Endogenous | 1. | 1.68E | 1.96E |
|                                                                                  |                |        | 6   | 3     | 00253  |            | 62 | -03   | -02   |
| Butabarbital                                                                     | C10 H16 N2 O3  | 212.12 | 3.6 | C0782 | HMDB00 | Exogenous  | 1. | 1.88E | 2.11E |
|                                                                                  |                |        | 4   | 7     | 14382  |            | 62 | -03   | -02   |

|                                   |          |        |     |       |        |            |    |       |       |
|-----------------------------------|----------|--------|-----|-------|--------|------------|----|-------|-------|
| Cyclamic acid                     | C6H13NO3 | 179.06 | 3.5 | C0282 | HMDB00 | Exogenous  | 1. | 1.44E | 1.71E |
|                                   | S        |        | 8   | 4     | 31340  |            | 61 | -03   | -02   |
| delta-Decalactone                 | C10H18O2 | 170.13 | 6.5 | null  | HMDB00 | Exogenous  | 1. | 2.34E | 2.49E |
|                                   |          |        | 3   |       | 37116  |            | 61 | -03   | -02   |
| LysoPE(0:0/20:2(11Z,14Z))         | C25H48N  | 505.31 | 9.7 | null  | HMDB00 | Endogenous | 1. | 2.20E | 2.38E |
|                                   | O7P      |        | 4   |       | 11483  |            | 61 | -03   | -02   |
| Octadecyl fumarate                | C22H40O4 | 368.29 | 9.6 | null  | HMDB00 | Exogenous  | 1. | 2.37E | 2.49E |
|                                   |          |        | 5   |       | 38073  |            | 61 | -03   | -02   |
| N6-Methyladenosine                | C11H15N5 | 281.11 | 0.7 | null  | HMDB00 | Endogenous | 1. | 1.92E | 2.14E |
|                                   | O4       |        | 7   |       | 04044  |            | 60 | -03   | -02   |
| Nepitrin                          | C22H22   | 478.11 | 5.2 | null  | HMDB00 | Exogenous  | 1. | 1.19E | 1.52E |
|                                   | O12      |        | 8   |       | 30548  |            | 60 | -03   | -02   |
| 2-Hexyl-3-phenyl-2-propenal       | C15H20O  | 216.15 | 8.8 | null  | HMDB00 | Exogenous  | 1. | 2.40E | 2.52E |
|                                   |          |        | 3   |       | 31736  |            | 59 | -03   | -02   |
| Pregabalin                        | C8H17NO2 | 159.13 | 6.6 | null  | HMDB00 | Exogenous  | 1. | 2.09E | 2.29E |
|                                   |          |        | 4   |       | 14375  |            | 59 | -03   | -02   |
| 1,2,3-Tris(1-ethoxyethoxy)propane | C15H32O6 | 308.22 | 9.6 | null  | HMDB00 | Exogenous  | 1. | 2.27E | 2.43E |
|                                   |          |        | 6   |       | 37162  |            | 59 | -03   | -02   |
| LysoPE(0:0/18:2(9Z,12Z))          | C23H44N  | 477.29 | 9.3 | null  | HMDB00 | Endogenous | 1. | 2.87E | 2.83E |
|                                   | O7P      |        | 4   |       | 11477  |            | 59 | -03   | -02   |
| 12,13-DHOME                       | C18H34O4 | 314.25 | 10. | C1482 | HMDB00 | Endogenous | 1. | 2.72E | 2.74E |
|                                   |          |        | 00  | 9     | 04705  |            | 58 | -03   | -02   |
| Caffeine                          | C8H10N4  | 194.08 | 5.7 | C0748 | HMDB00 | Exogenous  | 1. | 2.56E | 2.61E |
|                                   | O2       |        | 9   | 1     | 01847  |            | 58 | -03   | -02   |
| Quercitrin                        | C21H20   | 448.10 | 4.6 | C0175 | HMDB00 | Exogenous  | 1. | 3.12E | 2.95E |
|                                   | O11      |        | 4   | 0     | 33751  |            | 58 | -03   | -02   |



|                                                               |              |        |     |       |        |            |       |       |       |
|---------------------------------------------------------------|--------------|--------|-----|-------|--------|------------|-------|-------|-------|
| Butyl levulinate                                              | C9 H16 O3    | 172.11 | 4.7 | null  | HMDB00 | Exogenous  | 1.    | 2.28E | 2.44E |
|                                                               |              |        | 5   |       |        |            | 40165 | 58    | -03   |
| 16-Acetylpriverogenin A                                       | C32 H50 O5   | 514.36 | 9.6 | null  | HMDB00 | Exogenous  | 1.    | 1.66E | 1.94E |
|                                                               |              |        | 5   |       |        |            | 34529 | 58    | -03   |
| 3,6-Epoxy-5,5',6,6'-tetrahydro-b,b-carotene-3',5,5',6'-tetrol | C40 H58 O5   | 618.43 | 9.9 | null  | HMDB00 | Exogenous  | 1.    | 2.55E | 2.60E |
|                                                               |              |        | 8   |       |        |            | 29654 | 58    | -03   |
| DG(18:4(6Z,9Z,12Z,15Z)/15:0/0:0)                              | C36 H62 O5   | 574.46 | 10. | null  | HMDB00 | Exogenous  | 1.    | 2.76E | 2.75E |
|                                                               |              |        | 13  |       |        |            | 07329 | 57    | -03   |
| Malondialdehyde                                               | C3 H4 O2     | 72.02  | 0.7 | C1944 | HMDB00 | Endogenous | 1.    | 3.48E | 3.19E |
|                                                               |              |        | 2   |       |        |            | 0     | 06112 | 57    |
| Glutaric acid                                                 | C5 H8 O4     | 132.04 | 0.6 | C0048 | HMDB00 | Endogenous | 1.    | 3.69E | 3.34E |
|                                                               |              |        | 5   |       |        |            | 9     | 00661 | 57    |
| O-pentadecanoylcarnitine                                      | C22 H43 N O4 | 385.32 | 8.4 | null  | HMDB00 | Endogenous | 1.    | 3.52E | 3.22E |
|                                                               |              |        | 7   |       |        |            | 62517 | 57    | -03   |
| Levetiracetam                                                 | C8 H14 N2 O2 | 170.11 | 3.5 | null  | HMDB00 | Exogenous  | 1.    | 2.62E | 2.66E |
|                                                               |              |        | 5   |       |        |            | 15333 | 57    | -03   |
| 9-Methyluric acid                                             | C6 H6 N4 O3  | 182.04 | 1.1 | null  | HMDB00 | Exogenous  | 1.    | 1.95E | 2.16E |
|                                                               |              |        | 9   |       |        |            | 01973 | 56    | -03   |
| Hexyl 2-furoate                                               | C11 H16 O3   | 196.11 | 4.8 | null  | HMDB00 | Exogenous  | 1.    | 2.53E | 2.60E |
|                                                               |              |        | 1   |       |        |            | 37725 | 56    | -03   |
| 4alpha-hydroxymethyl-4beta-methylzymosterol                   | C29 H48 O2   | 428.37 | 10. | null  | HMDB00 | Endogenous | 1.    | 4.09E | 3.55E |
|                                                               |              |        | 61  |       |        |            | 62390 | 55    | -03   |
| 2,6-Di-tert-butyl-4-hydroxymethylphenol                       | C15 H24 O2   | 236.18 | 8.2 | null  | HMDB00 | Exogenous  | 1.    | 3.01E | 2.91E |
|                                                               |              |        | 0   |       |        |            | 32048 | 55    | -03   |
| Dimethyl fumarate                                             | C6 H8 O4     | 144.04 | 0.7 | null  | HMDB00 | Exogenous  | 1.    | 4.38E | 3.71E |
|                                                               |              |        | 1   |       |        |            | 31257 | 54    | -03   |

|                                                           |             |        |       |       |        |            |      |          |          |
|-----------------------------------------------------------|-------------|--------|-------|-------|--------|------------|------|----------|----------|
| 2-Hexaprenyl-3-methyl-5-hydroxy-6-methoxy-1,4-benzoquinol | C38 H58 O4  | 578.43 | 10.47 | null  | HMDB00 | Exogenous  | 1.54 | 3.90E-03 | 3.45E-02 |
| 3-(3,4-dihydroxyphenyl)-2-(sulfoxy)propanoic acid         | C9 H10 O8 S | 278.01 | 0.61  | null  | HMDB01 | Exogenous  | 1.53 | 3.24E-03 | 3.05E-02 |
| Eucalyptol                                                | C10 H18 O   | 154.14 | 8.02  | C0984 | HMDB00 | Exogenous  | 1.53 | 3.71E-03 | 3.35E-02 |
| Diethylhexyl adipate                                      | C22 H42 O4  | 370.31 | 9.84  | C1424 | HMDB00 | Exogenous  | 1.52 | 4.23E-03 | 3.65E-02 |
| Geosmin                                                   | C12 H22 O   | 182.17 | 8.77  | C1628 | HMDB00 | Exogenous  | 1.52 | 4.43E-03 | 3.72E-02 |
| 3-Oxotetradecanoic acid                                   | C14 H26 O3  | 242.19 | 8.82  | null  | HMDB00 | Endogenous | 1.52 | 4.30E-03 | 3.68E-02 |
| Sebacic acid                                              | C10 H18 O4  | 202.12 | 6.64  | C0827 | HMDB00 | Endogenous | 1.52 | 4.73E-03 | 3.85E-02 |
| 3-Oxododecanoic acid                                      | C12 H22 O3  | 214.16 | 7.71  | C0236 | HMDB00 | Endogenous | 1.52 | 5.02E-03 | 4.01E-02 |
| 3-Oxohexadecanoic acid                                    | C16 H30 O3  | 270.22 | 9.23  | null  | HMDB00 | Endogenous | 1.52 | 4.18E-03 | 3.61E-02 |
| p-Cresol sulfate                                          | C7 H8 O4 S  | 188.01 | 4.01  | null  | HMDB00 | Endogenous | 1.52 | 6.13E-03 | 4.53E-02 |
| 27-Nor-5b-cholestane-3a,7a,12a,24,25-pentol               | C26 H46 O5  | 438.33 | 9.21  | null  | HMDB00 | Endogenous | 1.52 | 3.54E-03 | 3.23E-02 |
| L-Norleucine                                              | C6 H13 N O2 | 131.09 | 1.75  | C0193 | HMDB00 | Endogenous | 1.52 | 3.64E-03 | 3.30E-02 |
| Ibuprofen                                                 | C13 H18 O2  | 206.13 | 4.87  | C0158 | HMDB00 | Exogenous  | 1.51 | 4.75E-03 | 3.87E-02 |

|                                        |                |        |     |       |        |            |    |       |       |
|----------------------------------------|----------------|--------|-----|-------|--------|------------|----|-------|-------|
| 1-Methyluric acid                      | C6H6N4O3       | 182.04 | 2.3 | C1635 | HMDB00 | Exogenous  | 1. | 3.93E | 3.46E |
|                                        |                |        | 6   | 9     | 03099  |            | 51 | -03   | -02   |
| Methyl 2-octynoate                     | C9H14O2        | 154.10 | 6.3 | null  | HMDB00 | Exogenous  | 1. | 5.12E | 4.04E |
|                                        |                |        | 7   |       | 31302  |            | 51 | -03   | -02   |
| Phenylmethyl butanoate                 | C11H14O2       | 178.10 | 6.3 | null  | HMDB00 | Exogenous  | 1. | 4.61E | 3.80E |
|                                        |                |        | 1   |       | 33376  |            | 50 | -03   | -02   |
| 3-methyl-1-phenyl-2-butene             | C11H14         | 146.11 | 7.7 | null  | HMDB00 | Exogenous  | 1. | 4.89E | 3.93E |
|                                        |                |        | 7   |       | 61808  |            | 49 | -03   | -02   |
| Myristic acid                          | C14H28O2       | 228.21 | 9.7 | C0642 | HMDB00 | Endogenous | 1. | 5.51E | 4.24E |
|                                        |                |        | 6   | 4     | 00806  |            | 49 | -03   | -02   |
| Polyporusterone C                      | C28H44O6       | 476.31 | 8.9 | null  | HMDB00 | Exogenous  | 1. | 5.53E | 4.24E |
|                                        |                |        | 9   |       | 38497  |            | 49 | -03   | -02   |
| Sphingosine 1-phosphate                | C18H38N<br>O5P | 379.25 | 9.5 | C0612 | HMDB00 | Endogenous | 1. | 6.37E | 4.65E |
|                                        |                |        | 5   | 4     | 00277  |            | 49 | -03   | -02   |
| 3-Methyl-5-pentyl-2-furannonanoic acid | C19H32O3       | 308.23 | 8.3 | null  | HMDB00 | Exogenous  | 1. | 5.51E | 4.24E |
|                                        |                |        | 4   |       | 31091  |            | 49 | -03   | -02   |
| 2,5-Dimethyl-4-ethoxy-3(2H)-furanone   | C8H12O3        | 156.08 | 3.8 | null  | HMDB00 | Exogenous  | 1. | 6.81E | 4.82E |
|                                        |                |        | 2   |       | 32232  |            | 48 | -03   | -02   |
| Carisoprodol                           | C12H24N2<br>O4 | 260.17 | 0.7 | C0792 | HMDB00 | Exogenous  | 1. | 6.70E | 4.77E |
|                                        |                |        | 7   | 7     | 14539  |            | 46 | -03   | -02   |
| Cyclopassifloic acid B                 | C31H52O6       | 520.38 | 9.6 | null  | HMDB00 | Exogenous  | 1. | 6.09E | 4.51E |
|                                        |                |        | 2   |       | 38388  |            | 46 | -03   | -02   |
| (9E)-10-nitrooctadecenoic Acid         | C18H33N<br>O4  | 327.24 | 7.0 | null  | HMDB00 | Endogenous | 1. | 6.85E | 4.84E |
|                                        |                |        | 9   |       | 62737  |            | 46 | -03   | -02   |
| 3,4-Dihydrocadalene                    | C15H20         | 200.16 | 7.8 | null  | HMDB00 | Exogenous  | 1. | 7.02E | 4.92E |
|                                        |                |        | 2   |       | 36453  |            | 46 | -03   | -02   |

|                                   |                   |        |     |    |         |              |            |       |           |           |
|-----------------------------------|-------------------|--------|-----|----|---------|--------------|------------|-------|-----------|-----------|
| 2,6 Dimethylheptanoyl carnitine   | C16 H31 N O4      | 301.23 | 6.3 | 7  | null    | HMDB00 06320 | Endogenous | 1. 46 | 5.72E -03 | 4.35E -02 |
| Lanthionine ketimine              | C6 H7 N O4 S      | 189.01 | 2.5 | 3  | null    | HMDB00 04823 | Endogenous | 1. 46 | 6.30E -03 | 4.62E -02 |
| Cysteinyl-Serine                  | C6 H12 N2 O4 S    | 208.05 | 4.9 | 5  | null    | HMDB00 28784 | Endogenous | 1. 45 | 5.43E -03 | 4.20E -02 |
| 2-Tetradecylcyclobutanone         | C18 H34 O         | 266.26 | 10. | 01 | null    | HMDB00 37517 | Exogenous  | 1. 45 | 6.39E -03 | 4.66E -02 |
| Anagrelide                        | C10 H7 Cl2 N3 O   | 255.00 | 5.5 | 6  | null    | HMDB00 14406 | Exogenous  | 1. 45 | 4.79E -03 | 3.87E -02 |
| Alpha-Tocopherol                  | C29 H50 O2        | 430.38 | 11. | 19 | C0247 7 | HMDB00 01893 | Endogenous | 1. 44 | 4.95E -03 | 3.96E -02 |
| Pyruvic acid                      | C3 H4 O3          | 88.02  | 0.6 | 5  | C0002 2 | HMDB00 00243 | Endogenous | 1. 44 | 6.18E -03 | 4.56E -02 |
| Prostaglandin E1                  | C20 H34 O5        | 354.24 | 7.7 | 1  | C0474 1 | HMDB00 01442 | Endogenous | 1. 43 | 6.03E -03 | 4.49E -02 |
| 6-Thioxanthine 5'-monophosphate   | C10 H13 N4 O8 P S | 380.02 | 0.7 | 5  | C1661 8 | HMDB00 60418 | Endogenous | 1. 43 | 6.70E -03 | 4.77E -02 |
| 2-Phenylethyl octanoate           | C16 H24 O2        | 248.18 | 7.9 | 7  | null    | HMDB00 37719 | Exogenous  | 1. 42 | 7.13E -03 | 4.98E -02 |
| PE(18:4(6Z,9Z,12Z,15Z)/24:1(15Z)) | C47 H84 N O8 P    | 821.59 | 11. | 25 | C0035 0 | HMDB00 09212 | Endogenous | 1. 42 | 6.80E -03 | 4.82E -02 |
| Acrylamide                        | C3 H5 N O         | 71.04  | 9.6 | 2  | C0165 9 | HMDB00 04296 | Exogenous  | 1. 41 | 7.02E -03 | 4.92E -02 |
| Varanic acid                      | C26 H44 O5        | 436.32 | 9.6 | 3  | null    | HMDB00 02195 | Endogenous | 1. 40 | 6.63E -03 | 4.77E -02 |

|                       |            |        |       |        |             |            |      |          |          |
|-----------------------|------------|--------|-------|--------|-------------|------------|------|----------|----------|
| TG(8:0/8:0/13:0)      | C32 H60 O6 | 540.44 | 10.03 | null   | HMDB0072647 | Exogenous  | 1.39 | 7.04E-03 | 4.92E-02 |
| 3-Hydroxybenzoic acid | C7 H6 O3   | 138.03 | 3.00  | C00587 | HMDB0002466 | Endogenous | 1.37 | 2.88E-03 | 2.83E-02 |

---

**Table S8 KEGG enrichment analysis results in metabolomics.**

| <b>Term</b>                                            | <b>Total</b> | <b>Expected</b> | <b>Hits</b> | <b>Raw p</b> | <b>-log10(p)</b> | <b>Holm<br/>adjust</b> | <b>FDR</b> | <b>Impact</b> |
|--------------------------------------------------------|--------------|-----------------|-------------|--------------|------------------|------------------------|------------|---------------|
| Caffeine metabolism                                    | 10           | 0.15            | 3           | 3.20E-04     | 3.49E+00         | 2.69E-02               | 2.69E-02   | 1.00          |
| Glycosylphosphatidylinositol (GPI)-anchor biosynthesis | 14           | 0.21            | 1           | 1.90E-01     | 7.22E-01         | 1.00E+00               | 1.00E+00   | 0.00          |
| Citrate cycle (TCA cycle)                              | 20           | 0.30            | 1           | 2.60E-01     | 5.85E-01         | 1.00E+00               | 1.00E+00   | 0.05          |
| Sphingolipid metabolism                                | 21           | 0.31            | 1           | 2.71E-01     | 5.67E-01         | 1.00E+00               | 1.00E+00   | 0.02          |
| Pyruvate metabolism                                    | 22           | 0.33            | 1           | 2.82E-01     | 5.50E-01         | 1.00E+00               | 1.00E+00   | 0.21          |
| Glycolysis / Gluconeogenesis                           | 26           | 0.39            | 1           | 3.24E-01     | 4.89E-01         | 1.00E+00               | 1.00E+00   | 0.10          |
| Alanine, aspartate and glutamate metabolism            | 28           | 0.42            | 1           | 3.44E-01     | 4.63E-01         | 1.00E+00               | 1.00E+00   | 0.00          |
| Glyoxylate and dicarboxylate metabolism                | 32           | 0.47            | 1           | 3.83E-01     | 4.17E-01         | 1.00E+00               | 1.00E+00   | 0.00          |
| Glycine, serine and threonine metabolism               | 33           | 0.49            | 1           | 3.93E-01     | 4.06E-01         | 1.00E+00               | 1.00E+00   | 0.00          |
| Cysteine and methionine metabolism                     | 33           | 0.49            | 1           | 3.93E-01     | 4.06E-01         | 1.00E+00               | 1.00E+00   | 0.00          |
| Biosynthesis of unsaturated fatty acids                | 36           | 0.53            | 1           | 4.20E-01     | 3.77E-01         | 1.00E+00               | 1.00E+00   | 0.00          |
| Arachidonic acid metabolism                            | 36           | 0.53            | 1           | 4.20E-01     | 3.77E-01         | 1.00E+00               | 1.00E+00   | 0.02          |
| Glycerophospholipid metabolism                         | 36           | 0.53            | 1           | 4.20E-01     | 3.77E-01         | 1.00E+00               | 1.00E+00   | 0.10          |
| Arginine and proline metabolism                        | 38           | 0.56            | 1           | 4.37E-01     | 3.59E-01         | 1.00E+00               | 1.00E+00   | 0.00          |
| Drug metabolism - other enzymes                        | 39           | 0.58            | 1           | 4.46E-01     | 3.51E-01         | 1.00E+00               | 1.00E+00   | 0.05          |
| Tyrosine metabolism                                    | 42           | 0.62            | 1           | 4.71E-01     | 3.27E-01         | 1.00E+00               | 1.00E+00   | 0.00          |
| Fatty acid biosynthesis                                | 47           | 0.70            | 1           | 5.10E-01     | 2.92E-01         | 1.00E+00               | 1.00E+00   | 0.00          |
| Steroid hormone biosynthesis                           | 85           | 1.26            | 1           | 7.29E-01     | 1.37E-01         | 1.00E+00               | 1.00E+00   | 0.03          |
